# Supplementary material for: αEβ7 Integrin Identifies Subsets of Pro-Inflammatory Colonic CD4+ T Lymphocytes in Ulcerative Colitis
Source: PubMed Central journal article supplement (PMC5815571; doi:10.1093/ecco-jcc/jjw189), 2016-12-07
Supplement: jjw189_suppl_supplementary_data.pdf [file jjw189_suppl_supplementary_data.pdf]

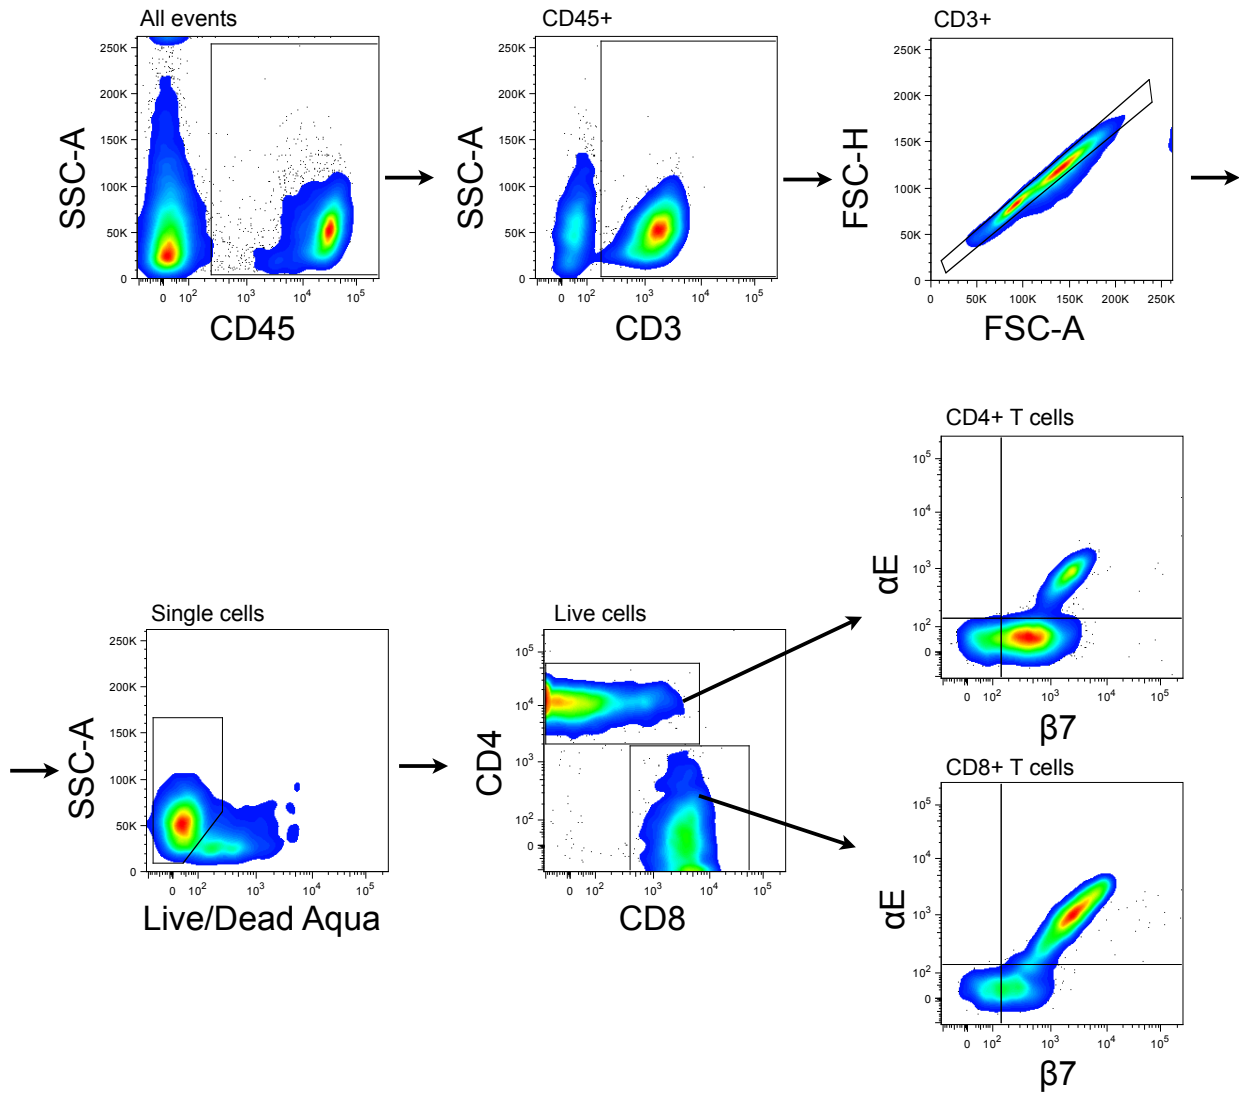

**Supplementary Figure 1: Gating strategy to identify integrin expressing T cells by flow cytometry**

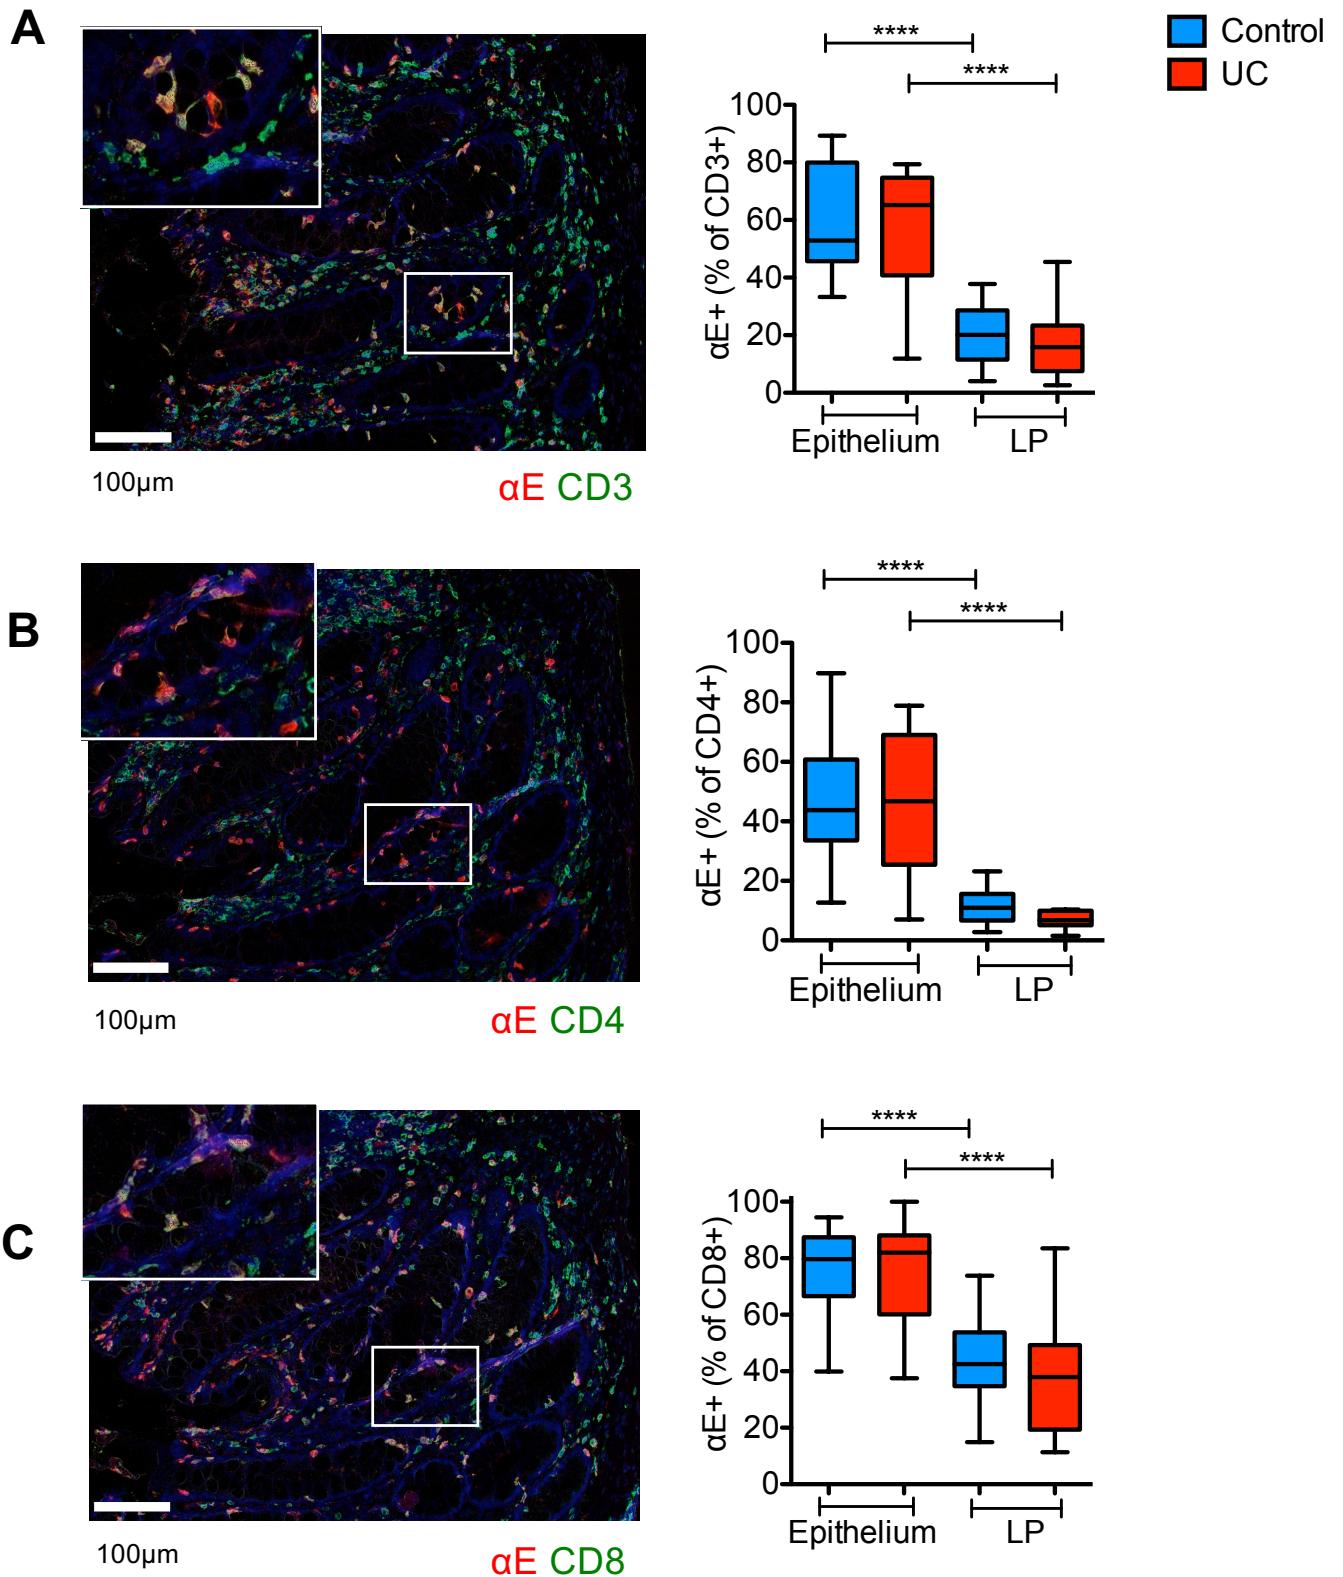

**Supplementary Figure 2: A higher proportion of intraepithelial than lamina propria lymphocytes express the  $\alpha$ E integrin**

Dual stain IHC was performed on formalin-fixed paraffin-embedded colonic biopsies to evaluate co-expression of the  $\alpha$ E integrin (shown in red) with (A) CD3, (B) CD4 and (C) CD8 lymphocytes (all shown in green) in colonic biopsies from control subjects (n=16) and patients with active UC (n=14). Representative Nuance spectrally unmixed images (with magnified insert) from a UC patient are shown for each pair of stains. Automated morphometric analysis was used to enumerate cellular expression of single or dual chromagen. Dual-expressing cells contain yellow. Scale bars represent 100 $\mu$ m.

**A**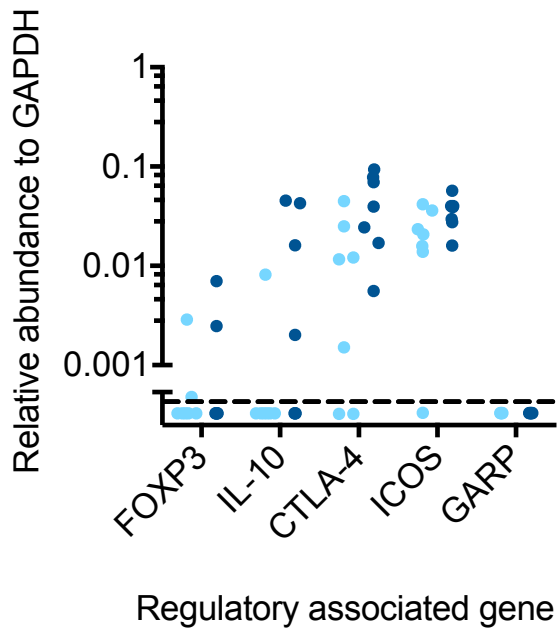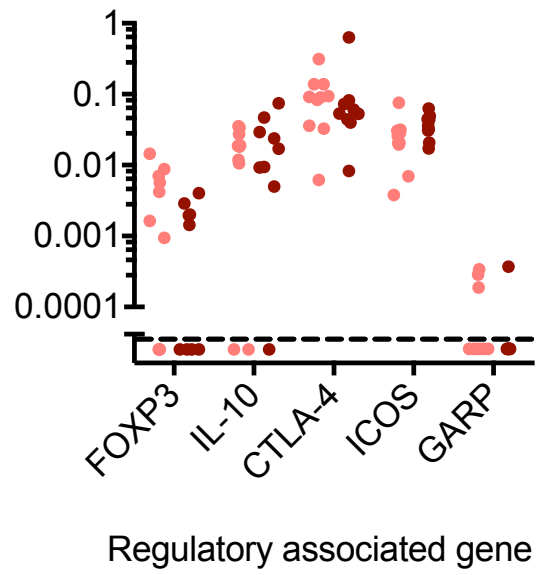**B**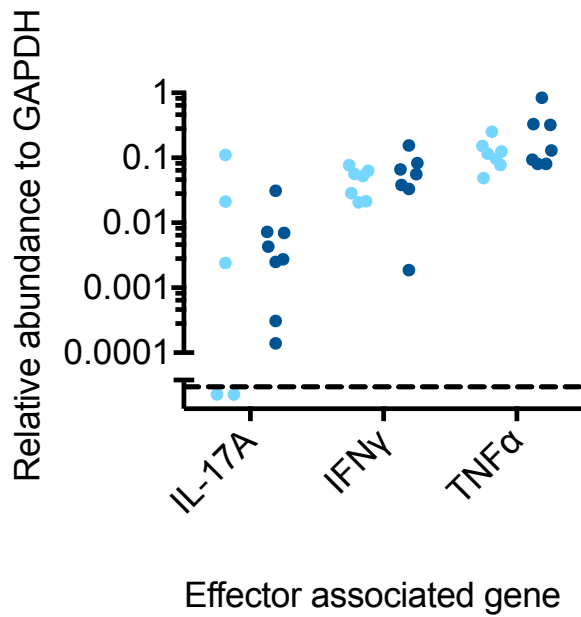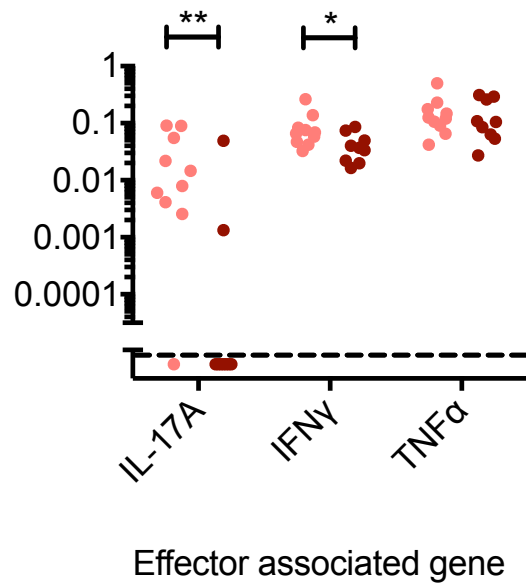

Control

- CD4+ $\alpha$ E+
- CD4+ $\alpha$ E-

UC

- CD4+ $\alpha$ E+
- CD4+ $\alpha$ E-

### Supplementary Figure 3: CD8+ $\alpha$ E+ and CD8+ $\alpha$ E- colonic T lymphocytes have a similar expression of regulatory and effector genes

FACS-sorted CD8+ $\alpha$ E+ and CD8+ $\alpha$ E- T lymphocytes from colonic biopsies harvested from control subjects (n=8) and patients with active UC (n=10) were analysed by qPCR for expression of (A&B) regulatory and (C&D) effector associated genes.

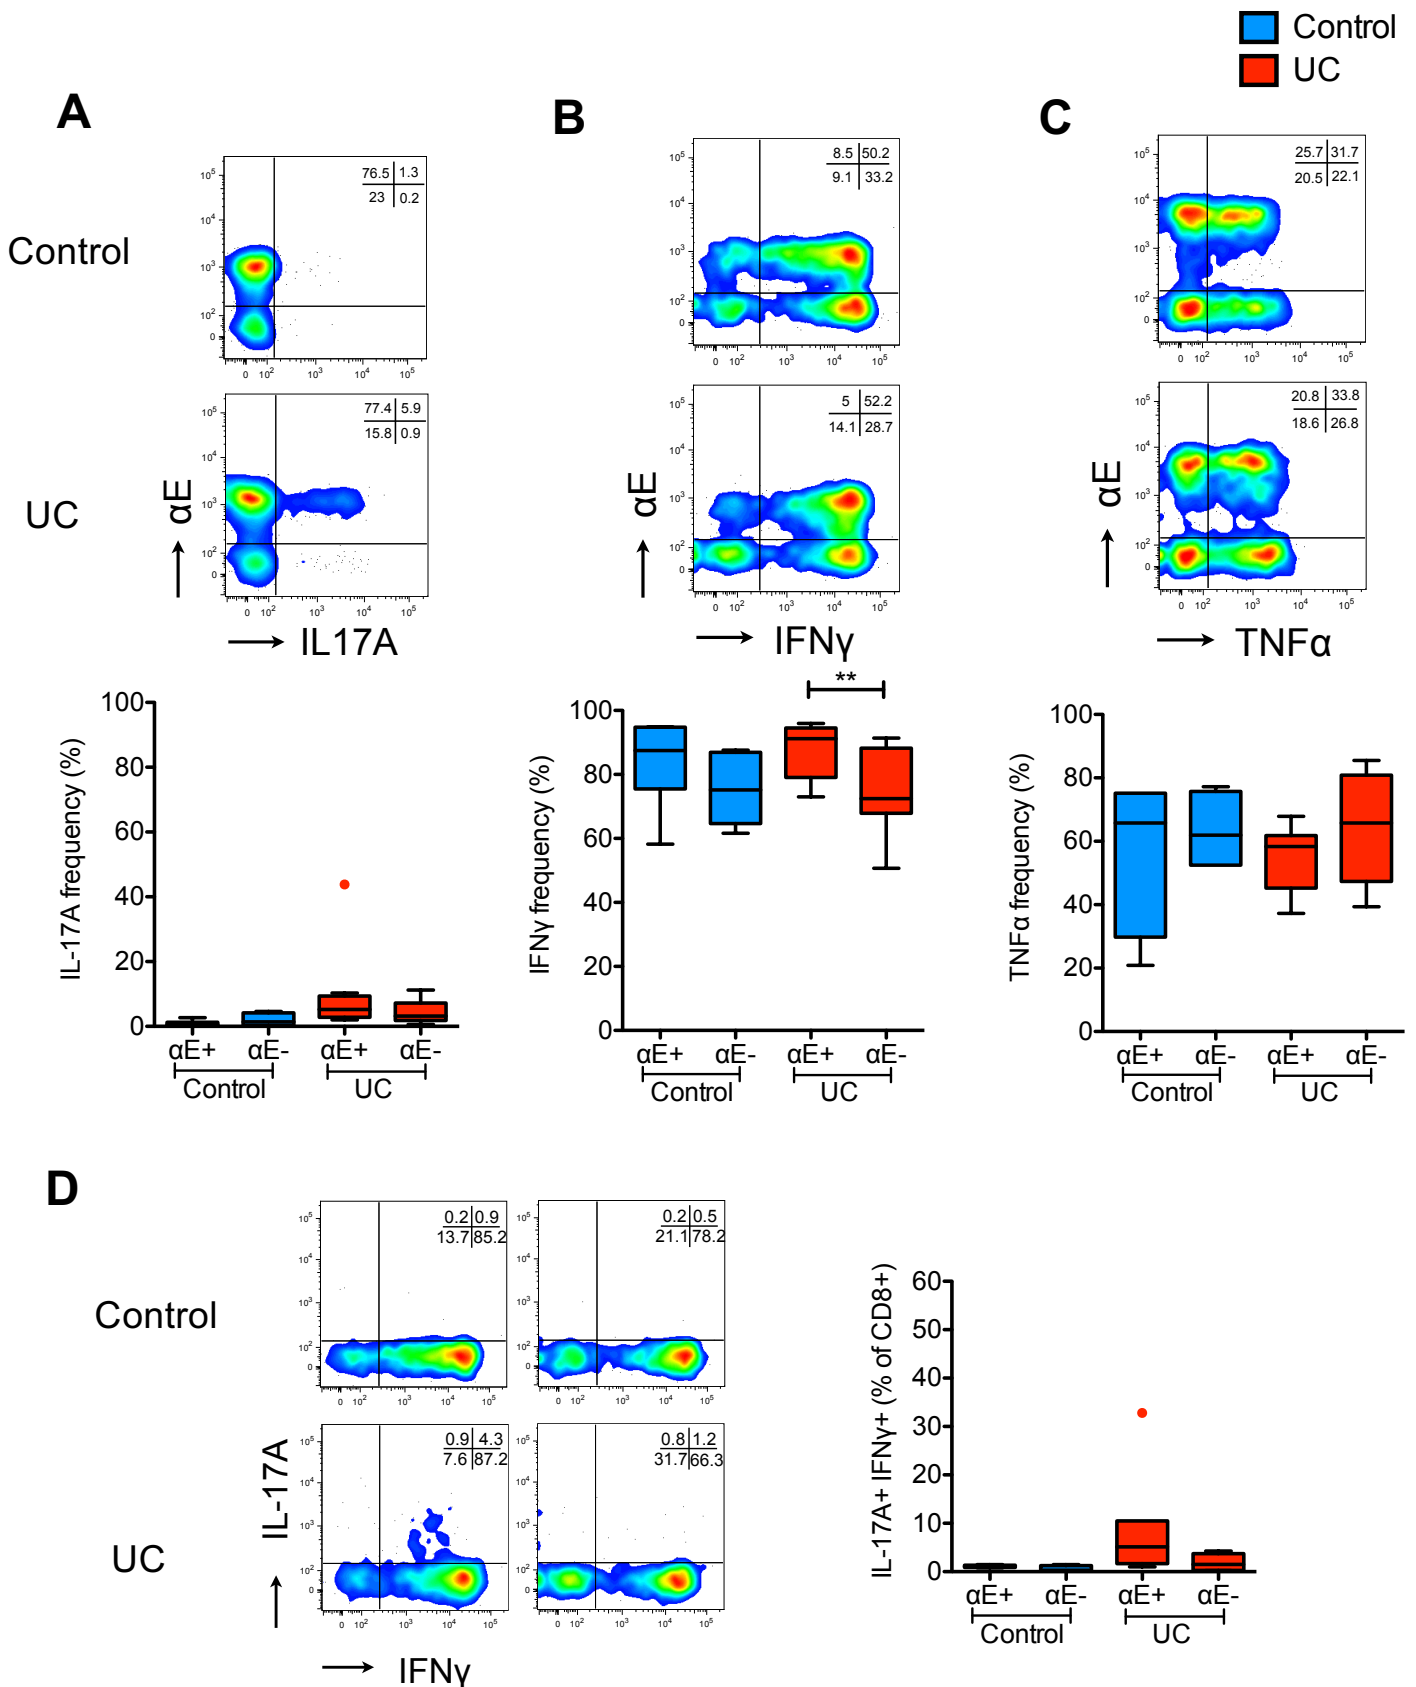

**Supplementary Figure 4: Both CD8+ $\alpha$ E+ and CD8+ $\alpha$ E- lymphocyte subsets have a low potential to express IL-17A, but a high potential to express IFN $\gamma$  and TNF $\alpha$**

Colonic CD8+ $\alpha$ E+ and CD8+ $\alpha$ E- T lymphocytes were stimulated *ex-vivo* and evaluated by FACS to determine effector cytokine production of (A) IL-17A (n=6 control subjects and n=8 patients with active UC), (B) IFN $\gamma$  (n=6 control subjects and n=8 patients with active UC), (C) TNF $\alpha$  (n=4 control subjects and n=6 patients with active UC), and (D) dual IL-17A and IFN $\gamma$  (n=4 control subjects and n=6 patients with active UC). Representative 2-colour FACS plots and summary Tukey box plots are shown for each cytokine or cytokine pair.

| Antibody                      | Fluorochrome    | Isotype | Clone       | Host  | Source         |
|-------------------------------|-----------------|---------|-------------|-------|----------------|
| $\alpha$ E integrin           | FITC            | IgG1k   | Ber-ACT8    | Mouse | BD Pharmingen  |
| $\alpha$ E integrin           | PE              | IgG1k   | Ber-ACT8    | Mouse | eBioscience    |
| $\beta$ 7 integrin            | PE              | IgG2ak  | FIB504      | Rat   | BD Pharmingen  |
| $\alpha$ 4 $\beta$ 7 integrin | Alexa Fluor 647 | IgG1k   | ACT1        | Mouse | From hybridoma |
| CD45                          | PE              | IgG1k   | 2D1         | Mouse | eBioscience    |
| CD3                           | eFluor450       | IgG2ak  | OKT3        | Mouse | eBioscience    |
| CD3                           | PerCP Cy5.5     | IgG2ak  | OKT3        | Mouse | eBioscience    |
| CD4                           | PE-Cy7          | IgG1k   | RPA-T4      | Mouse | eBioscience    |
| CD8 $\alpha$                  | APC Cy7         | IgG1k   | HIT8a       | Mouse | Biolegend      |
| CD161                         | APC             | IgG1k   | DX12        | Mouse | BD Pharmingen  |
| IL-17A                        | PE              | IgG1k   | N49-653     | Mouse | BD Pharmingen  |
| TNF $\alpha$                  | Alexa Fluor 647 | IgG1k   | Mab11       | Mouse | Biolegend      |
| IFN $\gamma$                  | APC             | IgG1k   | B27         | Mouse | BD Pharmingen  |
| Isotype                       | FITC            | IgG1k   | P3.6.2.8.1  | Mouse | eBioscience    |
| Isotype                       | PE              | IgG1k   | P3.6.2.8.1  | Mouse | eBioscience    |
| Isotype                       | PE              | IgG2ak  | R39-95      | Rat   | BD Pharmingen  |
| Isotype                       | PE-Cy7          | IgG1k   | P.3.6.2.8.1 | Mouse | eBioscience    |
| Isotype                       | Alexa Fluor 647 | IgG1k   | MOPC-21     | Mouse | Biolegend      |
| Isotype                       | APC             | IgG1k   | MOPC-21     | Mouse | BD Pharmingen  |
| Isotype                       | APC Cy7         | IgG1k   | MOPC-21     | Mouse | Biolegend      |

**Supplementary Table 1: Antibodies used for cell surface and intracellular flow cytometric analysis**

| Antibody            | Host   | Clone   | Dilution   | Manufacturer |
|---------------------|--------|---------|------------|--------------|
| $\alpha$ E integrin | Mouse  | EPR4166 | 1:2000     | Epitomics    |
| CD3                 | Mouse  | LN10    | 1:50       | Leica        |
| CD4                 | Rabbit | Sp35    | Pre-dilute | Ventana      |
| CD8                 | Mouse  | UCH-T4  | 1:40       | Ventana      |
| FOXP3               | Mouse  | 259D    | 1:100      | Biolegend    |
| Isotype             | Mouse  | MOPC21  | Pre-dilute | Ventana      |
| Isotype             | Rabbit | -       | Pre-dilute | Ventana      |

**Supplementary Table 2: Immunohistochemistry antibodies**
